# Supplementary material for: Full Transcriptomic Response of Pseudomonas aeruginosa to an Inulin-Derived Fructooligosaccharide
Source: Front Microbiol. 2020 Feb 20;11:202. doi: 10.3389/fmicb.2020.00202 (PMC7044273; doi:10.3389/fmicb.2020.00202)
Supplement: Supplementary file 2 [file Table_2.xlsx]

## Sheet: FOS&Without
Supl. Table S2. Differentially expressed genes in P. aeruginosa PAO1 exposed to FOS treatment.
The downregulated genes are shown in letter thick, the upregulated are shown normal letter.
	baseMean	log2FoldChange	lfcSE	stat	pvalue	padj
PA0627	328.137	-3.72548	0.294121	-12.6665	9.07107e-37	5.1052e-34
PA0621	1756.11	-3.20627	0.39568	-8.10319	5.35383e-16	6.27736e-14
PA0628	1756.62	-2.93948	0.210999	-13.9313	4.08983e-44	1.15088e-40
PA0631	89.4934	-2.90997	0.383729	-7.58342	3.36572e-14	3.26591e-12
PA0637	308.933	-2.77488	0.243881	-11.378	5.38157e-30	1.1649e-27
PA0807	121.61	-2.68486	0.334955	-8.01557	1.09625e-15	1.14254e-13
PA0629	723.386	-2.58954	0.199156	-13.0026	1.18216e-38	1.66329e-35
PA0638	772.731	-2.56003	0.198443	-12.9006	4.46826e-38	4.19123e-35
PA0616	762.334	-2.53556	0.205697	-12.3267	6.50722e-35	2.6159e-32
PA0620	5227.01	-2.5213	0.214847	-11.7353	8.4025e-32	2.36446e-29
PA0639	696.051	-2.4985	0.203693	-12.266	1.37916e-34	4.85119e-32
PA0622	4914.33	-2.48438	0.195532	-12.7058	5.49175e-37	3.86344e-34
PA0625	4864.1	-2.48184	0.196853	-12.6076	1.91736e-36	8.99241e-34
PA0636	2620.81	-2.45803	0.219443	-11.2013	4.0201e-29	7.07036e-27
PA0619	1004.2	-2.38986	0.207119	-11.5386	8.43082e-31	2.15676e-28
PA0912	83.9045	-2.35924	0.365754	-6.45035	1.11591e-10	7.85042e-09
PA0623	2234.16	-2.29213	0.192355	-11.9162	9.74916e-33	3.04824e-30
PA0624	965.376	-2.26537	0.201971	-11.2163	3.39152e-29	6.36249e-27
PA0642	857.025	-2.22705	0.238878	-9.32299	1.13107e-20	1.44674e-18
PA0633	1588.46	-2.17923	0.207758	-10.4893	9.67723e-26	1.60187e-23
PA0643	927.865	-2.15104	0.218819	-9.83022	8.34372e-23	1.17396e-20
PA0641	3556.79	-2.13028	0.185349	-11.4933	1.42479e-30	3.34114e-28
PA0626	789.595	-2.10029	0.186831	-11.2417	2.5456e-29	5.11666e-27
PA0617	683.787	-2.08963	0.218292	-9.57262	1.04235e-21	1.39675e-19
PA0632	216.943	-2.08815	0.259455	-8.04821	8.40104e-16	9.09251e-14
PA0640	1112.41	-2.07108	0.242484	-8.5411	1.32955e-17	1.62667e-15
PA0644	164.493	-2.00094	0.286116	-6.99345	2.68201e-12	2.15633e-10
PA0908	92.7438	-1.98323	0.327586	-6.05409	1.41217e-09	9.46153e-08
PA0618	1277.33	-1.93093	0.196171	-9.84311	7.34065e-23	1.08719e-20
PA0645	221.405	-1.90566	0.270016	-7.05759	1.69419e-12	1.44469e-10
PA0635	479.467	-1.87758	0.232229	-8.08507	6.21279e-16	6.99311e-14
PA0811	76.1403	-1.83518	0.327485	-5.60386	2.09629e-08	1.22895e-06
PA0630	123.165	-1.80329	0.324052	-5.56481	2.62431e-08	1.5071e-06
PA0809	74.0556	-1.70173	0.329797	-5.15991	2.47065e-07	1.15874e-05
PA0812	70.8545	-1.68266	0.351684	-4.78457	1.71353e-06	6.88838e-05
PA0910	182.987	-1.66627	0.246129	-6.7699	1.28874e-11	1.00737e-09
PA0634	854.187	-1.51061	0.224145	-6.7394	1.59037e-11	1.20954e-09
PA0646	1067.35	-1.49058	0.212251	-7.0227	2.17619e-12	1.80112e-10
PA0911	109.811	-1.40378	0.28657	-4.89857	9.65342e-07	4.24449e-05
PA0613	304.22	-1.29206	0.240402	-5.37459	7.67588e-08	4.07546e-06
PA0615	779.924	-1.28478	0.195827	-6.56079	5.3522e-11	3.86182e-09
PA0647	216.511	-1.26363	0.252052	-5.01335	5.349e-07	2.42776e-05
PA1183	102.806	-1.23133	0.277921	-4.43051	9.40093e-06	0.000343561
PA4823	81.2497	-1.19631	0.314121	-3.80843	0.000139851	0.00401573
PA0049	58.0451	-1.16056	0.33507	-3.46363	0.000532933	0.0116583
PA2111	82.6343	-1.12613	0.294111	-3.82892	0.000128709	0.0037339
PA2008	151.12	-1.11337	0.241342	-4.61327	3.9639e-06	0.000148726
PA0614	378.913	-1.10543	0.228352	-4.84089	1.2926e-06	5.51118e-05
PA1342	343.214	-1.08315	0.222303	-4.8724	1.10248e-06	4.77289e-05
PA5149	80.3976	-1.04534	0.371839	-2.81128	0.00493456	0.0667589
PA3661	105.654	-1.02064	0.308921	-3.30389	0.000953543	0.0185053
PA5169	87.7639	-0.98836	0.290829	-3.39842	0.000677763	0.014233
PA2001	81.5104	-0.973702	0.314401	-3.097	0.00195487	0.0339568
PA4240	274.7	-0.953851	0.219481	-4.34593	1.38685e-05	0.000487824
PA3866	664.843	-0.950833	0.229383	-4.14517	3.39561e-05	0.00111108
PA4370	152.76	-0.929077	0.238765	-3.89117	9.97608e-05	0.00301857
PA0795	99.8876	-0.892294	0.287287	-3.10593	0.00189683	0.0333604
PA1337	93.189	-0.876147	0.28827	-3.03933	0.00237106	0.0399531
PA0612	137.64	-0.851746	0.274439	-3.10359	0.00191185	0.0334158
PA0090	631.113	-0.840563	0.190822	-4.40497	1.058e-05	0.000378655
PA4825	12521.4	-0.822163	0.181738	-4.52389	6.07138e-06	0.000224801
PA4578	305.421	-0.821985	0.225063	-3.65225	0.000259949	0.00653122
PA3692	91.0221	-0.779302	0.282081	-2.76269	0.00573279	0.0757374
PA2796	112.135	-0.770992	0.268752	-2.86879	0.0041205	0.0591586
PA4824	1248.93	-0.758221	0.196808	-3.85259	0.000116877	0.00346203
PA1592	330.769	-0.754265	0.224905	-3.3537	0.000797392	0.0162599
PA2247	183.056	-0.74865	0.260807	-2.87051	0.00409808	0.0591586
PA2007	140.771	-0.725929	0.245974	-2.95123	0.00316506	0.0503191
PA2040	215.176	-0.709279	0.23357	-3.03669	0.0023919	0.0400644
PA4055	159.674	-0.700015	0.24695	-2.83464	0.00458768	0.0632853
PA4774	301.792	-0.671336	0.208851	-3.21442	0.00130707	0.0246551
PA4366	932.372	-0.665956	0.177263	-3.75688	0.000172048	0.00465521
PA4274	314.898	-0.656945	0.213326	-3.07954	0.00207319	0.0353572
PA1171	146.994	-0.643234	0.242452	-2.65303	0.0079772	0.0993267
PA4239	490.148	-0.627999	0.193498	-3.2455	0.00117245	0.0222923
PA4430	368.288	-0.599158	0.1983	-3.02148	0.00251542	0.0418841
PA4237	397.699	-0.583669	0.205618	-2.8386	0.00453114	0.0632853
PA1585	1764.88	-0.582556	0.176591	-3.2989	0.000970631	0.0187079
PA1588	1289.47	-0.572479	0.18557	-3.08497	0.0020357	0.035144
PA0296	338.728	-0.546735	0.201749	-2.70998	0.00672873	0.0872565
PA1069	1044.51	-0.534791	0.178179	-3.00143	0.00268715	0.043963
PA4826	511.857	-0.51813	0.183714	-2.8203	0.00479789	0.0652235
PA1787	1139.25	-0.500721	0.168821	-2.96599	0.00301709	0.0485149
PA5015	2675.06	0.435621	0.163589	2.6629	0.00774705	0.0977588
PA3496	1466.4	0.45842	0.168979	2.71289	0.00666996	0.0868947
PA2685	2384.78	0.482716	0.173414	2.78361	0.00537581	0.0713563
PA4418	1990.34	0.48463	0.164386	2.94811	0.00319719	0.0505443
PA4941	1766.89	0.487426	0.168714	2.88906	0.0038639	0.0572264
PA5285	825.276	0.501659	0.182796	2.74437	0.00606276	0.0797224
PA5040	813.271	0.511148	0.175632	2.91033	0.00361042	0.0552419
PA4961	649.383	0.511214	0.180355	2.8345	0.00458979	0.0632853
PA1803	1692.92	0.512226	0.173958	2.94454	0.0032343	0.0508454
PA3746	775.46	0.52649	0.181941	2.89374	0.00380681	0.0566792
PA0782	1629.49	0.528441	0.193835	2.72624	0.00640602	0.0838444
PA3345	345.797	0.53031	0.199274	2.66121	0.00778608	0.0978127
PA0896	1202.82	0.539659	0.168069	3.21094	0.001323	0.0246551
PA1084	885.16	0.540677	0.176952	3.05551	0.00224681	0.0380875
PA3116	562.61	0.544598	0.204354	2.66497	0.00769957	0.0975973
PA0577	521.129	0.548219	0.18738	2.92571	0.00343672	0.0534306
PA3296	371.763	0.551228	0.205021	2.68864	0.00717433	0.0917662
PA5255	941.795	0.552906	0.204768	2.70016	0.0069307	0.0894632
PA3161	509.854	0.564335	0.199196	2.83307	0.00461034	0.0632853
PA4545	760.262	0.567533	0.190252	2.98306	0.00285381	0.0464198
PA5288	1692.38	0.573974	0.194078	2.95743	0.0031021	0.0495984
PA5045	657.661	0.576066	0.185352	3.10795	0.00188388	0.0333411
PA4432	3325.16	0.579047	0.204525	2.83119	0.00463757	0.0633501
PA3744	1427.68	0.587347	0.204344	2.8743	0.00404921	0.0590387
PA5152	599.644	0.587998	0.183045	3.21231	0.0013167	0.0246551
PA3019	452.092	0.590093	0.188929	3.12336	0.001788	0.0322528
PA0762	1562.29	0.596637	0.169509	3.5198	0.000431878	0.00996152
PA4520	400.795	0.602117	0.195325	3.08264	0.00205171	0.0352044
PA3383	799.347	0.602857	0.178599	3.37547	0.000736884	0.0151357
PA4611	851.147	0.60358	0.227369	2.65463	0.0079396	0.0992979
PA5013	1267.05	0.603635	0.171222	3.52545	0.000422763	0.00983187
PA4844	1161.93	0.606462	0.217678	2.78605	0.00533545	0.0711561
PA4378	238.238	0.606963	0.211906	2.8643	0.00417934	0.0594339
PA0768	380.372	0.607655	0.208834	2.90975	0.00361715	0.0552419
PA1382	292.994	0.609843	0.210397	2.89853	0.00374916	0.0564179
PA2667	631.225	0.609873	0.191617	3.18277	0.00145873	0.0268293
PA0730	240.837	0.612336	0.213797	2.8641	0.00418192	0.0594339
PA2971	1417.9	0.614423	0.203704	3.01626	0.00255912	0.0423609
PA4944	1301.58	0.615211	0.193264	3.18327	0.00145621	0.0268293
PA2637	319.4	0.615941	0.212696	2.89588	0.00378101	0.0565944
PA4960	535.117	0.617196	0.207413	2.9757	0.00292325	0.0472761
PA4963	1066.16	0.626476	0.185333	3.38027	0.000724156	0.0149836
PA1077	249.898	0.632033	0.221654	2.85144	0.00435223	0.0615436
PA3623	987.759	0.632898	0.203205	3.11458	0.00184205	0.0328071
PA4602	1238.1	0.638416	0.222523	2.86899	0.00411787	0.0591586
PA0026	166.88	0.640331	0.239359	2.67519	0.00746864	0.0950984
PA5066	299.506	0.642362	0.206075	3.11713	0.00182622	0.0327324
PA0842	383.413	0.642943	0.22898	2.80786	0.00498723	0.0671487
PA4280	431996	0.643744	0.173108	3.71875	0.000200213	0.00512181
PA0715	863.178	0.646059	0.240257	2.68903	0.0071659	0.0917662
PA4420	1144.35	0.649905	0.178262	3.64579	0.000266567	0.00663822
PA3903	431.908	0.653034	0.191464	3.41074	0.000647872	0.0138114
PA5348	803.718	0.653949	0.192156	3.40322	0.000665971	0.0140905
PA5332	2818.34	0.659378	0.168759	3.90721	9.33681e-05	0.00285585
PA5369	448952	0.660941	0.1748	3.78114	0.000156114	0.00430692
PA4690	450019	0.662607	0.174845	3.78969	0.000150834	0.00420245
PA5208	180.508	0.662627	0.233718	2.83516	0.00458025	0.0632853
PA4475	409.923	0.665692	0.200159	3.32583	0.000881569	0.0175939
PA5043	157.664	0.666148	0.237518	2.80463	0.00503749	0.0675023
PA0576	2376.59	0.67202	0.174942	3.84138	0.000122342	0.00358616
PA5058	189.729	0.672647	0.228712	2.94102	0.00327133	0.0511418
PA3147	386.46	0.676952	0.194057	3.48843	0.000485874	0.010938
PA0668	520146	0.680456	0.176009	3.86603	0.000110619	0.00331152
PA3382	383.032	0.681941	0.205488	3.31864	0.000904557	0.0178002
PA3193	246.573	0.686235	0.217507	3.15499	0.00160501	0.0293279
PA4741	2746.41	0.690246	0.220497	3.13041	0.00174561	0.0316913
PA2756	1234.2	0.693675	0.195947	3.54011	0.000399956	0.00937897
PA1796	4986.92	0.706116	0.203911	3.46287	0.000534444	0.0116583
PA5367	1830.8	0.709117	0.213358	3.32359	0.000888657	0.0176104
PA2461	147.573	0.711425	0.268528	2.64935	0.00806465	0.0999732
PA1606	400.073	0.730914	0.204482	3.57447	0.000350945	0.00836914
PA3351	795.244	0.733721	0.210633	3.48341	0.000495069	0.0110375
PA5286	1440.15	0.734081	0.210033	3.49508	0.000473913	0.0108422
PA4723	1567.99	0.735082	0.175543	4.18747	2.82077e-05	0.000933842
PA3563	118.876	0.74145	0.257395	2.88059	0.00396933	0.0584801
PA0826	402607	0.746206	0.173881	4.29148	1.77489e-05	0.000601751
PA5315	579.081	0.747002	0.207616	3.59801	0.000320667	0.00777893
PA5369	12337.3	0.748355	0.214436	3.48988	0.000483241	0.010938
PA1081	578.142	0.74841	0.205528	3.64141	0.000271152	0.00668507
PA1610	308.915	0.767589	0.204836	3.74734	0.000178718	0.00470011
PA4280	1275.94	0.776494	0.213354	3.63947	0.000273199	0.00668507
PA4690	1305.64	0.780719	0.234215	3.33334	0.000858105	0.0172479
PA1327	221.79	0.781399	0.218263	3.58007	0.000343496	0.00826152
PA3190	211.13	0.786404	0.273456	2.87579	0.00403014	0.0590387
PA0668	1465.69	0.787287	0.229443	3.43129	0.000600711	0.0129038
PA4264	3239.86	0.791491	0.194804	4.06301	4.84431e-05	0.00153167
PA5369	1343.4	0.799203	0.242603	3.29429	0.000986719	0.0188886
PA5170	138.083	0.805016	0.28254	2.84921	0.00438283	0.0616664
PA0408	1599.96	0.811938	0.174247	4.6597	3.16667e-06	0.000122069
PA4747	3344.66	0.81231	0.216371	3.75425	0.00017386	0.00465946
PA0019	659.901	0.813457	0.202026	4.02649	5.66163e-05	0.0017702
PA1608	312.912	0.815433	0.229557	3.5522	0.000382018	0.00903359
PA2738	3165.67	0.818939	0.185956	4.40394	1.06303e-05	0.000378655
PA3262	657.84	0.838152	0.251287	3.33544	0.000851645	0.0172412
PA4336	118.442	0.849133	0.282806	3.00253	0.00267744	0.043963
PA2548	392.649	0.850991	0.224076	3.79777	0.000146003	0.00410851
PA3384	860.332	0.852819	0.183415	4.64966	3.32487e-06	0.000126435
PA4421	2851.49	0.853579	0.17868	4.77713	1.77818e-06	7.0476e-05
PA5301	1580.16	0.868511	0.185915	4.67156	2.98925e-06	0.00011683
PA2022	147.856	0.870045	0.249887	3.48176	0.000498137	0.0110375
PA4451	455.023	0.877708	0.202547	4.33335	1.46855e-05	0.000503964
PA4462	1025.74	0.885037	0.183128	4.8329	1.34558e-06	5.65145e-05
PA5435	1914.45	0.895493	0.169022	5.29808	1.17028e-07	6.09845e-06
PA5042	160.906	0.904383	0.243022	3.72141	0.000198117	0.00512181
PA4525	3556.86	0.929969	0.244421	3.80478	0.00014193	0.00403426
PA3990	141.742	0.932017	0.248438	3.7515	0.000175778	0.00466641
PA4270	221.689	0.932737	0.250733	3.72005	0.000199185	0.00512181
PA4853	155.619	0.934777	0.254425	3.67408	0.000238708	0.00605156
PA2882	180.363	0.956212	0.233039	4.10323	4.07415e-05	0.0013028
PA4421	679005	0.964641	0.160975	5.99248	2.0667e-09	1.32175e-07
PA4541	1035.99	1.00944	0.237051	4.25832	2.05967e-05	0.00068999
PA2696	56.5599	1.01282	0.348887	2.90299	0.00369619	0.0559198
PA2428	755.961	1.03197	0.189625	5.44216	5.26385e-08	2.84855e-06
PA4945	1499.19	1.03644	0.182459	5.6804	1.34376e-08	8.04543e-07
PA0668	98702.3	1.04667	0.201962	5.18251	2.18921e-07	1.06214e-05
PA5369	81710	1.04955	0.202946	5.17156	2.32144e-07	1.10721e-05
PA0979	230.88	1.04985	0.219294	4.78739	1.68967e-06	6.88838e-05
PA4335	85.174	1.05871	0.307584	3.44202	0.000577379	0.012498
PA4280	82749.9	1.0591	0.202161	5.2389	1.61536e-07	8.11718e-06
PA4690	81618.7	1.06046	0.201972	5.25051	1.51681e-07	7.76057e-06
PA3195	159.02	1.06203	0.267015	3.9774	6.96739e-05	0.00215453
PA3280	4024.4	1.0763	0.17885	6.01786	1.76738e-09	1.15661e-07
PA0693	222.27	1.08409	0.226494	4.78643	1.69777e-06	6.88838e-05
PA0952	74.8191	1.1132	0.336842	3.30482	0.000950389	0.0185053
PA4255	218.672	1.11514	0.256792	4.34257	1.40824e-05	0.000489233
PA0692	269.081	1.12296	0.22644	4.95922	7.07758e-07	3.16132e-05
PA0003	931.449	1.16513	0.174454	6.67872	2.41044e-11	1.78499e-09
PA0695	91.8189	1.17326	0.311322	3.76866	0.000164128	0.00448405
PA5235	151.447	1.20442	0.29352	4.10337	4.07175e-05	0.0013028
PA2426	66.4466	1.22176	0.360924	3.38509	0.000711551	0.0148319
PA0805	4363.17	1.22541	0.165361	7.4105	1.25824e-13	1.18023e-11
PA3219	300.439	1.2516	0.209985	5.96044	2.51564e-09	1.57312e-07
PA3560	393.682	1.30932	0.211187	6.19982	5.65277e-10	3.87973e-08
PA1673	179.295	1.31692	0.252454	5.21647	1.82365e-07	9.00309e-06
PA0691	168.019	1.34639	0.246728	5.45697	4.84325e-08	2.67234e-06
PA3181	202.297	1.37296	0.232143	5.91429	3.33309e-09	2.03898e-07
PA3192	88.5846	1.55024	0.301654	5.13915	2.75988e-07	1.27316e-05
PA1414	298.224	1.72685	0.593436	2.90993	0.00361515	0.0552419
PA3561	240.486	1.78104	0.24669	7.21975	5.20843e-13	4.72791e-11
PA3305	3038.48	1.91381	0.658009	2.90849	0.00363175	0.0552419
PA3194	395.433	1.92021	0.271217	7.07997	1.4419e-12	1.26797e-10
PA3182	60.4202	1.98717	0.358145	5.54851	2.8812e-08	1.62154e-06
PA3562	809.276	2.00184	0.195998	10.2136	1.72415e-24	2.69542e-22
PA3183	414.783	2.13114	0.266461	7.99792	1.26533e-15	1.27166e-13
